# Supplementary material
Source: publisher figshare collection journal article supplement (https://diabetesjournals.figshare.com/articles/dataset/_/25541839)
Supplement: Supplementary file 2 [file 1]

|                                         | Baseline      | Day 3       | Week 4      | Change Day 3-<br>Baseline | Change Week 4-<br>Baseline |
|-----------------------------------------|---------------|-------------|-------------|---------------------------|----------------------------|
| <b>Age (years)</b>                      |               |             |             |                           |                            |
| SAXA                                    | 57.5 ± 8.4    |             |             |                           |                            |
| DAPA                                    | 59.4 ± 7.6    |             |             |                           |                            |
| SAXA+DAPA                               | 58.4 ± 8.8    |             |             |                           |                            |
| <b>Sex (m/f)</b>                        |               |             |             |                           |                            |
| SAXA                                    | 12/3          |             |             |                           |                            |
| DAPA                                    | 10/5          |             |             |                           |                            |
| SAXA+DAPA                               | 8/7           |             |             |                           |                            |
| <b>Diabetes Duration (years)</b>        |               |             |             |                           |                            |
| SAXA                                    | 7.4 ± 7.2     |             |             |                           |                            |
| DAPA                                    | 6.9 ± 5.9     |             |             |                           |                            |
| SAXA+DAPA                               | 9.0 ± 8.5     |             |             |                           |                            |
| <b>Fasting Plasma Glucose (mg/dl)</b>   |               |             |             |                           |                            |
| SAXA                                    | 172.6 ± 6.9   | 165.5 ± 9.0 | 150.6 ± 5.7 | -7.1 ± 2.1*               | -22.1 ± 1.2*               |
| DAPA                                    | 169.8 ± 4.7   | 152.8 ± 5.8 | 145.8 ± 9.1 | -17.0 ± 1.1*              | -24.0 ± 4.4*               |
| SAXA+DAPA                               | 170.1 ± 9.2   | 139.0 ± 7.6 | 129.9 ± 5.2 | -31.1 ± 1.6*#             | -40.2 ± 4.0*               |
| <b>HbA1c (mmol/mol)</b>                 |               |             |             |                           |                            |
| SAXA                                    | 60.8 ± 9.5    |             |             |                           |                            |
| DAPA                                    | 57.9 ± 5.0    |             |             |                           |                            |
| SAXA+DAPA                               | 57.4 ± 3.3    |             |             |                           |                            |
| <b>Body weight (Kg)</b>                 |               |             |             |                           |                            |
| SAXA                                    | 89.4 ± 3.5    | 89.1 ± 3.4  | 87.9 ± 3.6  | -0.3 ± 0.1*               | -1.5 ± 0.1*                |
| DAPA                                    | 89.0 ± 3.0    | 88.5 ± 2.5  | 86.5 ± 2.3  | -0.5 ± 0.5*               | -2.5 ± 0.7*                |
| SAXA+DAPA                               | 84.6 ± 1.7    | 84.4 ± 3.0  | 82.8 ± 1.8  | -0.2 ± 1.3*               | -1.8 ± 0.1*                |
| <b>BMI (Kg/m<sup>2</sup>)</b>           |               |             |             |                           |                            |
| SAXA                                    | 31.1 ± 1.1    | 31.0 ± 1.2  | 30.6 ± 1.2  | -0.1 ± 0.1*               | -0.5 ± 0.1*                |
| DAPA                                    | 30.9 ± 0.8    | 30.6 ± 1.1  | 30.1 ± 0.7  | -0.3 ± 0.3*               | -0.8 ± 0.1*                |
| SAXA+DAPA                               | 30.0 ± 1.1    | 29.9 ± 1.2  | 29.3 ± 1.2  | -0.1 ± 0.1*               | -0.7 ± 0.1*                |
| <b>SBP (mmHg)</b>                       |               |             |             |                           |                            |
| SAXA                                    | 139.4 ± 4.0   | 130.1 ± 3.5 | 133.1 ± 3.6 | -9.3 ± 0.5*               | -6.3 ± 0.4*                |
| DAPA                                    | 144.6 ± 3.4   | 134.1 ± 4.0 | 135.2 ± 4.2 | -10.5 ± 0.6*              | -9.4 ± 0.8*                |
| SAXA+DAPA                               | 138.2 ± 5.0   | 133.7 ± 4.7 | 130.4 ± 5.1 | -4.5 ± 0.3*               | -7.8 ± 0.1*                |
| <b>DBP (mmHg)</b>                       |               |             |             |                           |                            |
| SAXA                                    | 91.4 ± 1.9    | 86.4 ± 1.7  | 85.2 ± 2.1  | -5.0 ± 0.2*               | -6.2 ± 0.2*                |
| DAPA                                    | 89.5 ± 1.7    | 83.2 ± 2.3  | 85.8 ± 1.8  | -6.3 ± 0.6*               | -3.7 ± 0.1*                |
| SAXA+DAPA                               | 86.4 ± 3.1    | 82.8 ± 2.1  | 80.5 ± 1.1  | -3.6 ± 1.0*               | -5.9 ± 2.0*                |
| <b>eGFR (ml/min/1.73 m<sup>2</sup>)</b> |               |             |             |                           |                            |
| SAXA                                    | 89.9 ± 13.6   |             |             |                           |                            |
| DAPA                                    | 92.0 ± 12.9   |             |             |                           |                            |
| SAXA+DAPA                               | 93.4 ± 13.5   |             |             |                           |                            |
| <b>Total Cholesterol (mg/dL)</b>        |               |             |             |                           |                            |
| SAXA                                    | 180.0 ± 65.2  |             |             |                           |                            |
| DAPA                                    | 175.9 ± 33.4  |             |             |                           |                            |
| SAXA+DAPA                               | 169.5 ± 32.3  |             |             |                           |                            |
| <b>C-HDL (mg/dl)</b>                    |               |             |             |                           |                            |
| SAXA                                    | 45.0 ± 9.6    |             |             |                           |                            |
| DAPA                                    | 46.7 ± 12.6   |             |             |                           |                            |
| SAXA+DAPA                               | 48.0 ± 13.4   |             |             |                           |                            |
| <b>C-LDL (mg/dl)</b>                    |               |             |             |                           |                            |
| SAXA                                    | 94.7 ± 46.9   |             |             |                           |                            |
| DAPA                                    | 94.6 ± 25.1   |             |             |                           |                            |
| SAXA+DAPA                               | 92.7 ± 28.2   |             |             |                           |                            |
| <b>Triglycerides (mg/dl)</b>            |               |             |             |                           |                            |
| SAXA                                    | 204.0 ± 141.9 |             |             |                           |                            |
| DAPA                                    | 147.6 ± 46.9  |             |             |                           |                            |
| SAXA+DAPA                               | 144.2 ± 55.0  |             |             |                           |                            |

Supplementary Table 1
