# Supplementary material
Source: publisher figshare collection journal article supplement (https://diabetesjournals.figshare.com/articles/dataset/_/25541839)
Supplement: Supplementary file 5 [file 1]

**Endogenous Glucose Production during MMTT**  
**SAXA**

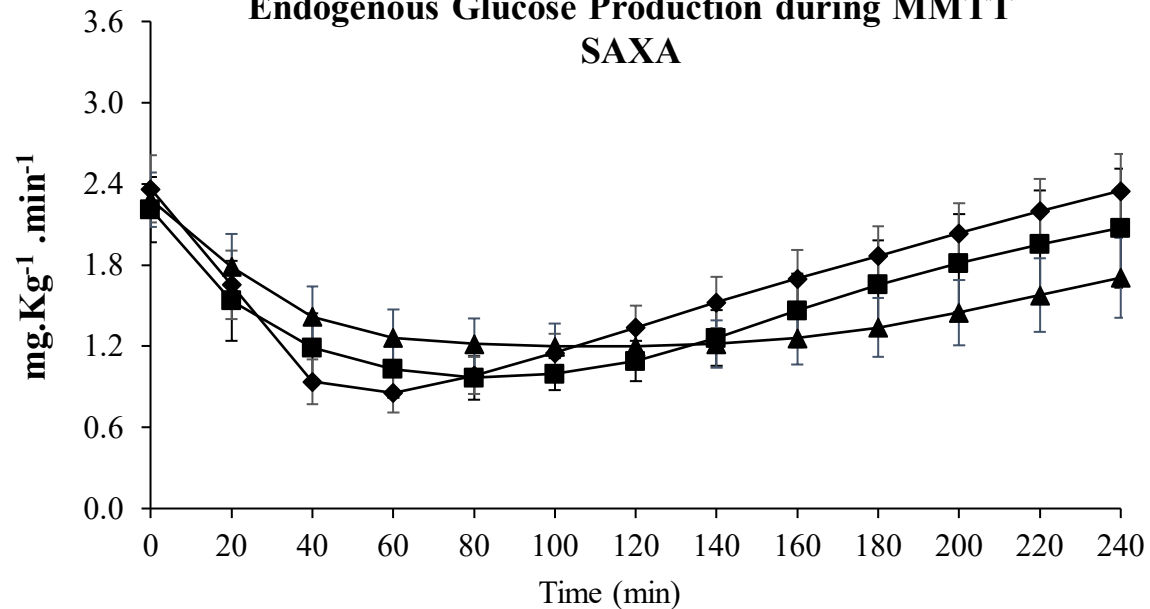

**Endogenous Glucose Production during MMTT**  
**DAPA**

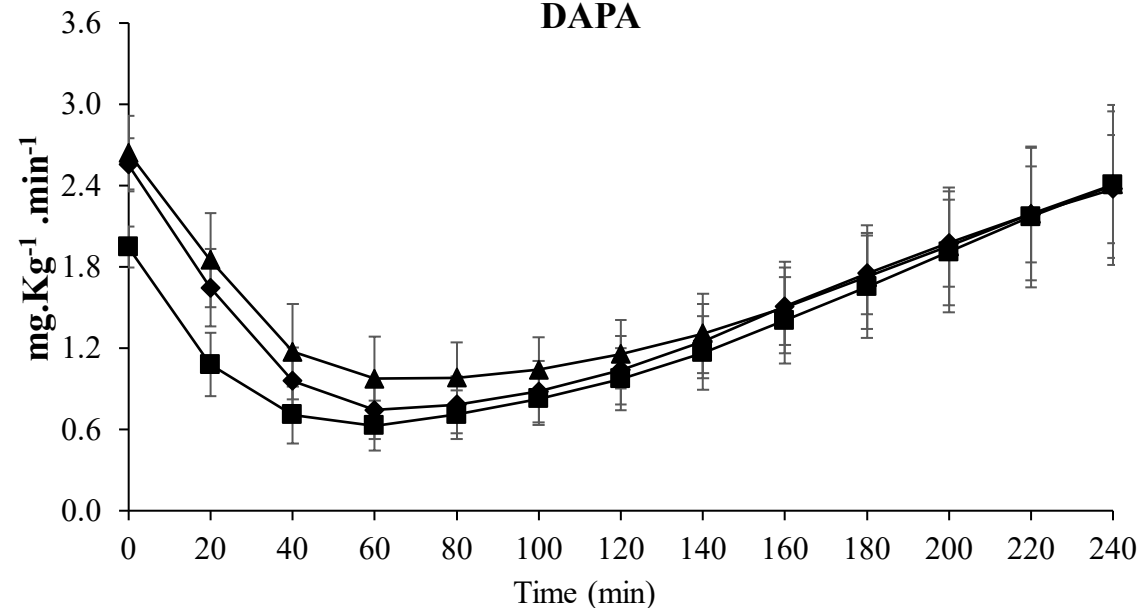

**Endogenous Glucose Production during MMTT**  
**SAXA+DAPA**

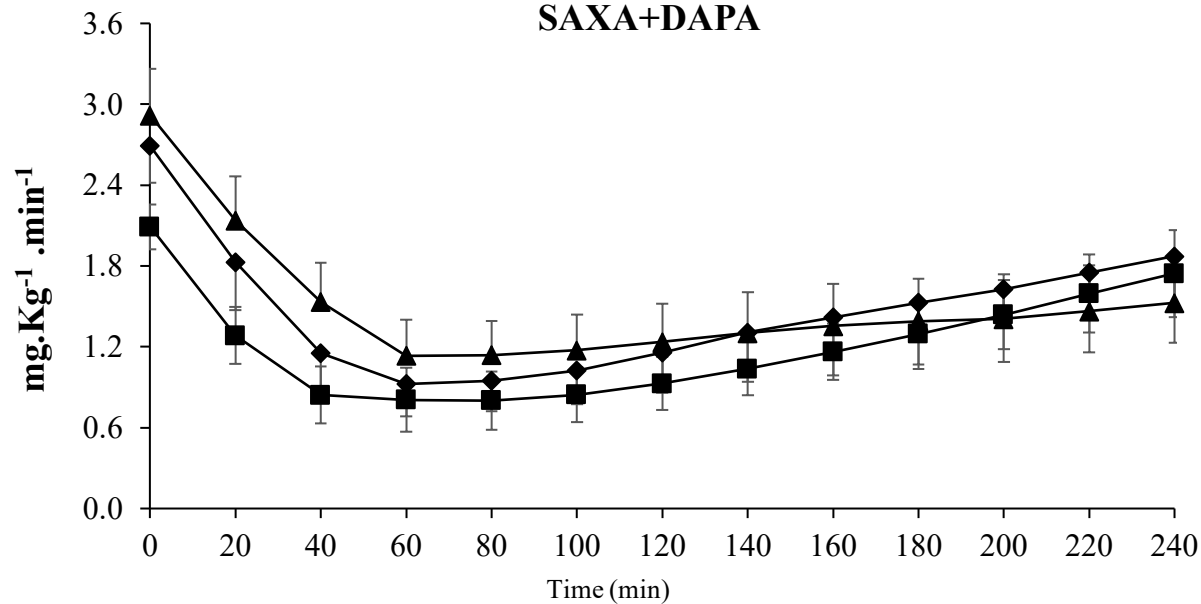

■ Baseline  
◆ Day 3  
▲ Week 4
