# Supplementary material
Source: publisher figshare collection journal article supplement (https://diabetesjournals.figshare.com/articles/dataset/_/25541839)
Supplement: Supplementary file 6 [file 1]

## **Legend to Supplementary Figures**

**Supplementary Figure 1:** Patient disposition

**Supplementary Figure 2:** Baseline Total GLP-1 concentration and changes during 240 min following MMTT with SAXA (A), DAPA (B) and SAXA+DAPA (C). Mean area under the curve (Mean AUC) of total GLP-1 following MMTT (D). \*P<0.05 vs. baseline. #P<0.05 vs. SAXA and DAPA. Data are presented as the mean  $\pm$  SEM.

**Supplementary Figure 3:** Baseline Glucagon concentration and changes during 240 min following MMTT with SAXA (A), DAPA (B) and SAXA+DAPA (C). Data are presented as the mean  $\pm$  SEM.

**Supplementary Figure 4:** Baseline insulin/glucagon (I/G) ratio and changes during 240 min following MMTT with SAXA (A), DAPA (B) and SAXA+DAPA (C). Data are presented as the mean  $\pm$  SEM.

**Supplementary Figure 5:** Baseline C-peptide/glucagon (C-Pep/G) ratio and changes during 240 min following MMTT with SAXA (A), DAPA (B) and SAXA+DAPA (C). Data are presented as the mean  $\pm$  SEM.

**Supplementary Figure 6:** Baseline plasma insulin and changes during 240 min following MMTT with SAXA (A), DAPA (B) and SAXA+DAPA (C). Data are presented as the mean  $\pm$  SEM.

**Supplementary Figure 7:** Baseline plasma C-peptide and changes during 240 min following MMTT with SAXA (A), DAPA (B) and SAXA+DAPA (C). Data are presented as the mean  $\pm$  SEM.

**Supplementary Figure 8:** Baseline Endogenous Glucose Production (EGP) and changes during 240 min following MMTT with SAXA (A), DAPA (B) and SAXA+DAPA (C). Data are presented as the mean  $\pm$  SEM.

**Supplementary Figure 9:** Baseline Metabolic Clearance Rate of Glucose (MCR<sub>glu</sub>) and changes during 240 min following MMTT with SAXA (A), DAPA (B) and SAXA+DAPA (C). Data are presented as the mean  $\pm$  SEM.

**Supplementary Figure 10:** Baseline Rate of Oral Glucose Appearance (RaO) and changes during 240 min following MMTT with SAXA (A), DAPA (B) and SAXA+DAPA (C). Data are presented as the mean  $\pm$  SEM.

#### **Legend to Supplementary Table**

**Supplementary Table 1:** Demographics, baseline characteristics and changes at day 3 and week 4 after treatment. \*P<0.05 vs. baseline. #P<0.05 vs. SAXA and DAPA. Data are presented as the mean  $\pm$  SEM.
