# Supplementary material
Source: publisher figshare collection journal article supplement (https://diabetesjournals.figshare.com/articles/dataset/_/25541839)

A

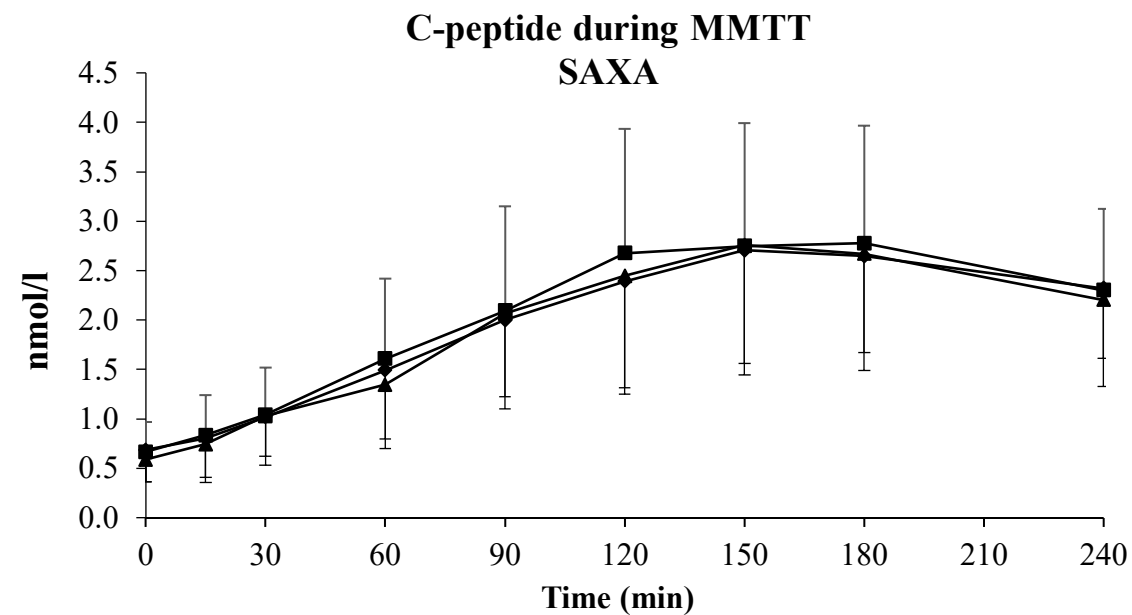

B

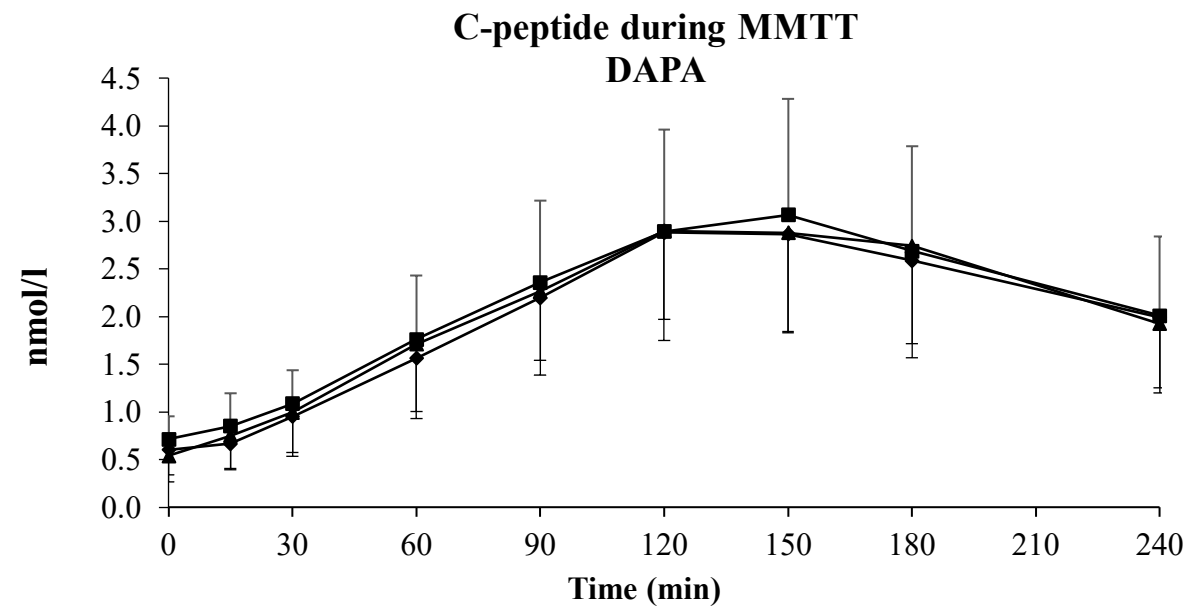

C

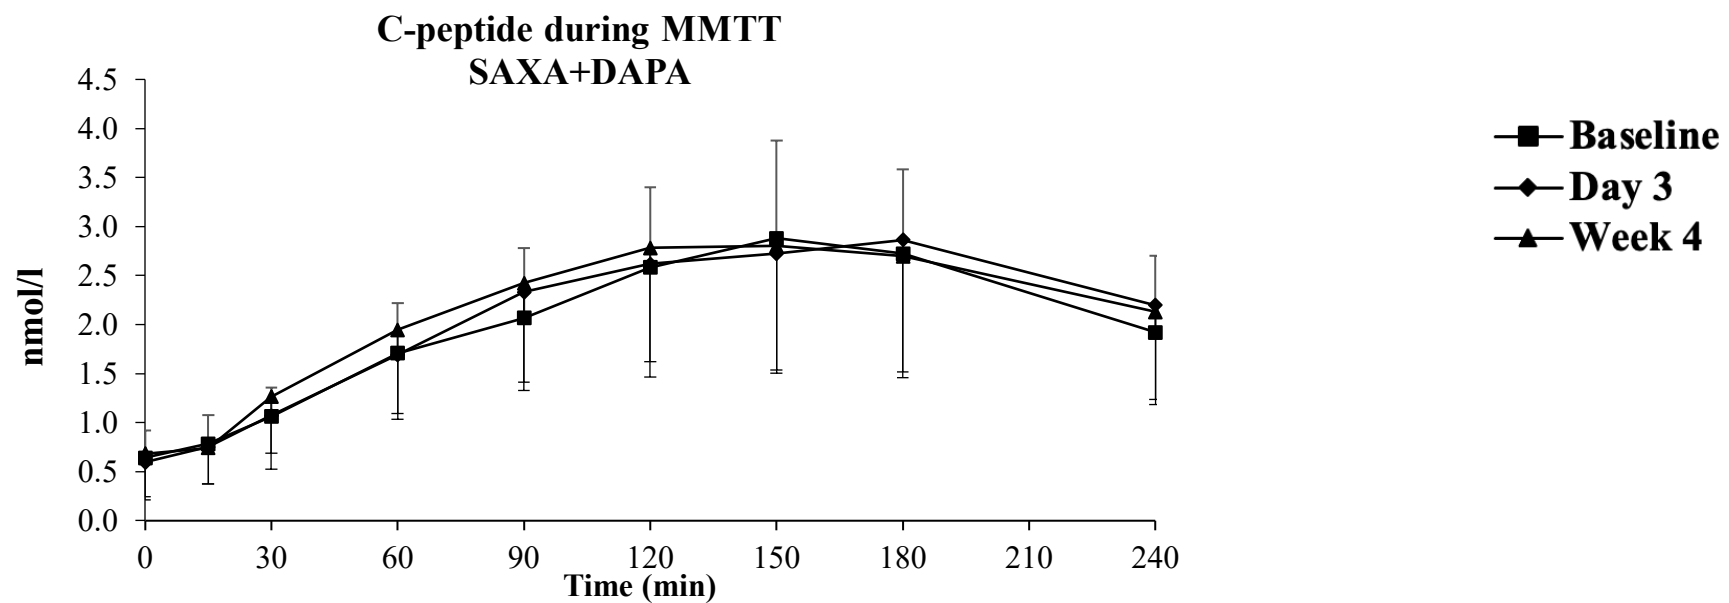

Supplementary Figure 7

Supplement: Supplementary file 1 [file 1]

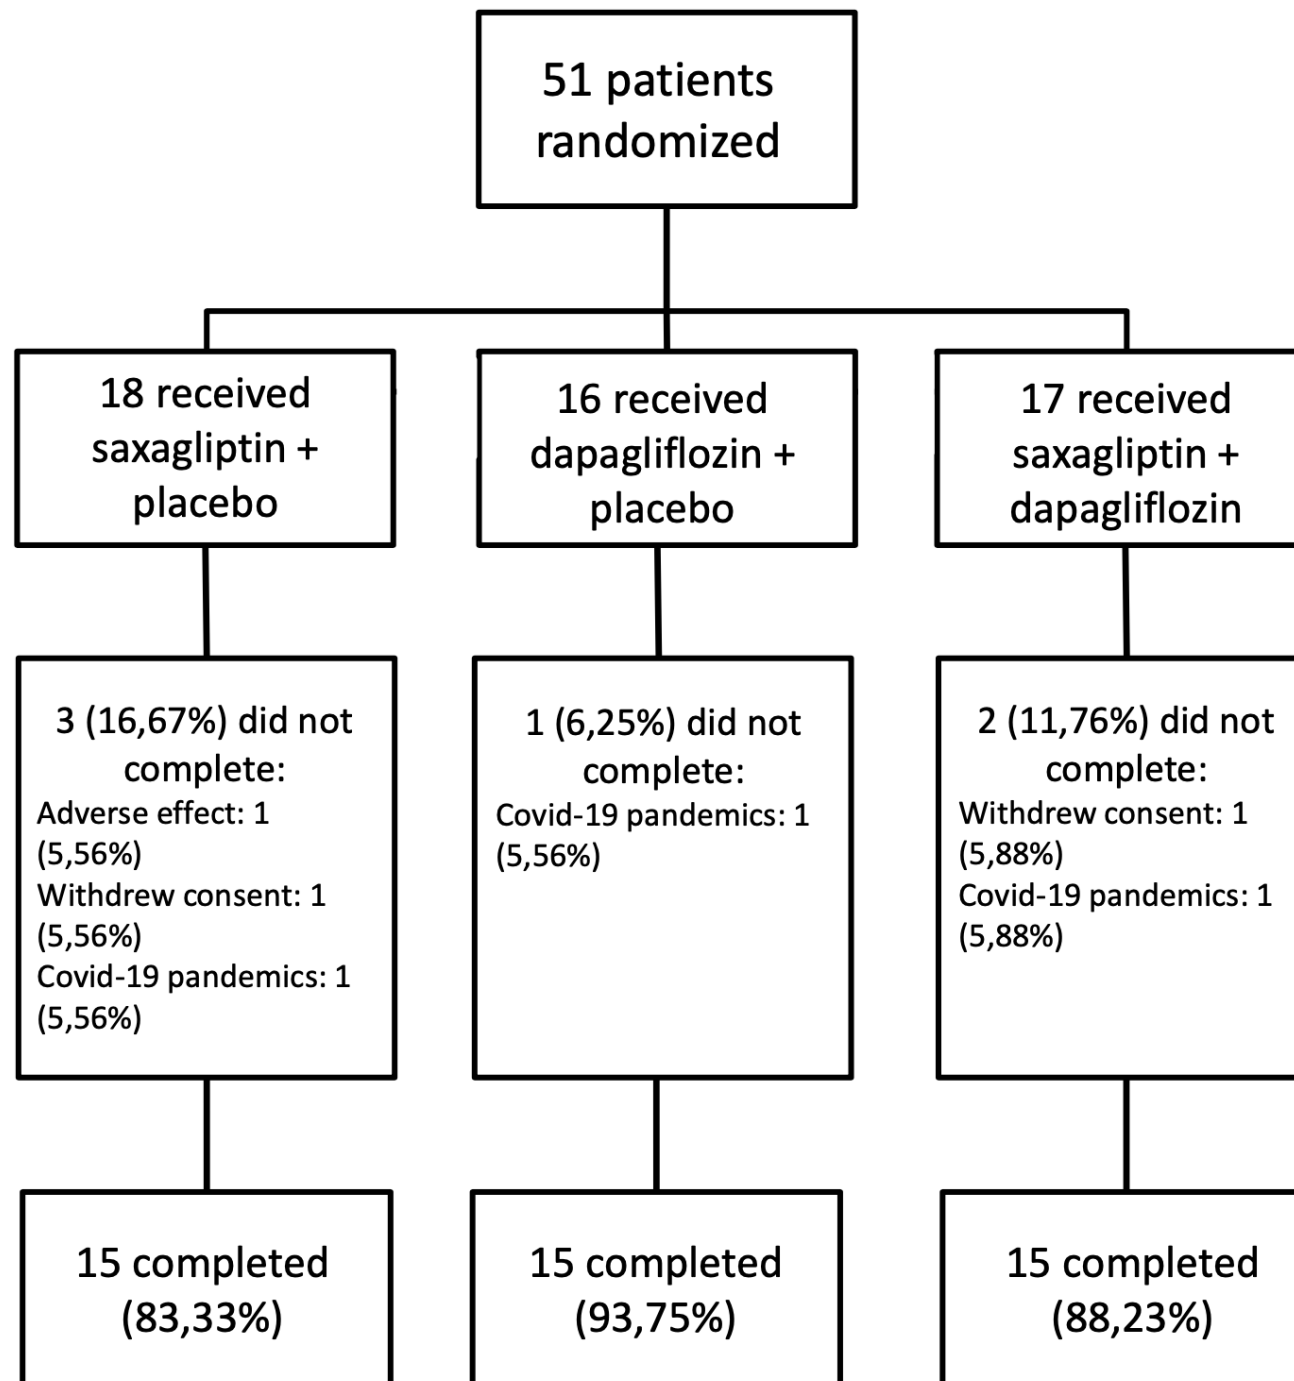

Supplementary Figure 1

Supplement: Supplementary file 3 [file 1]

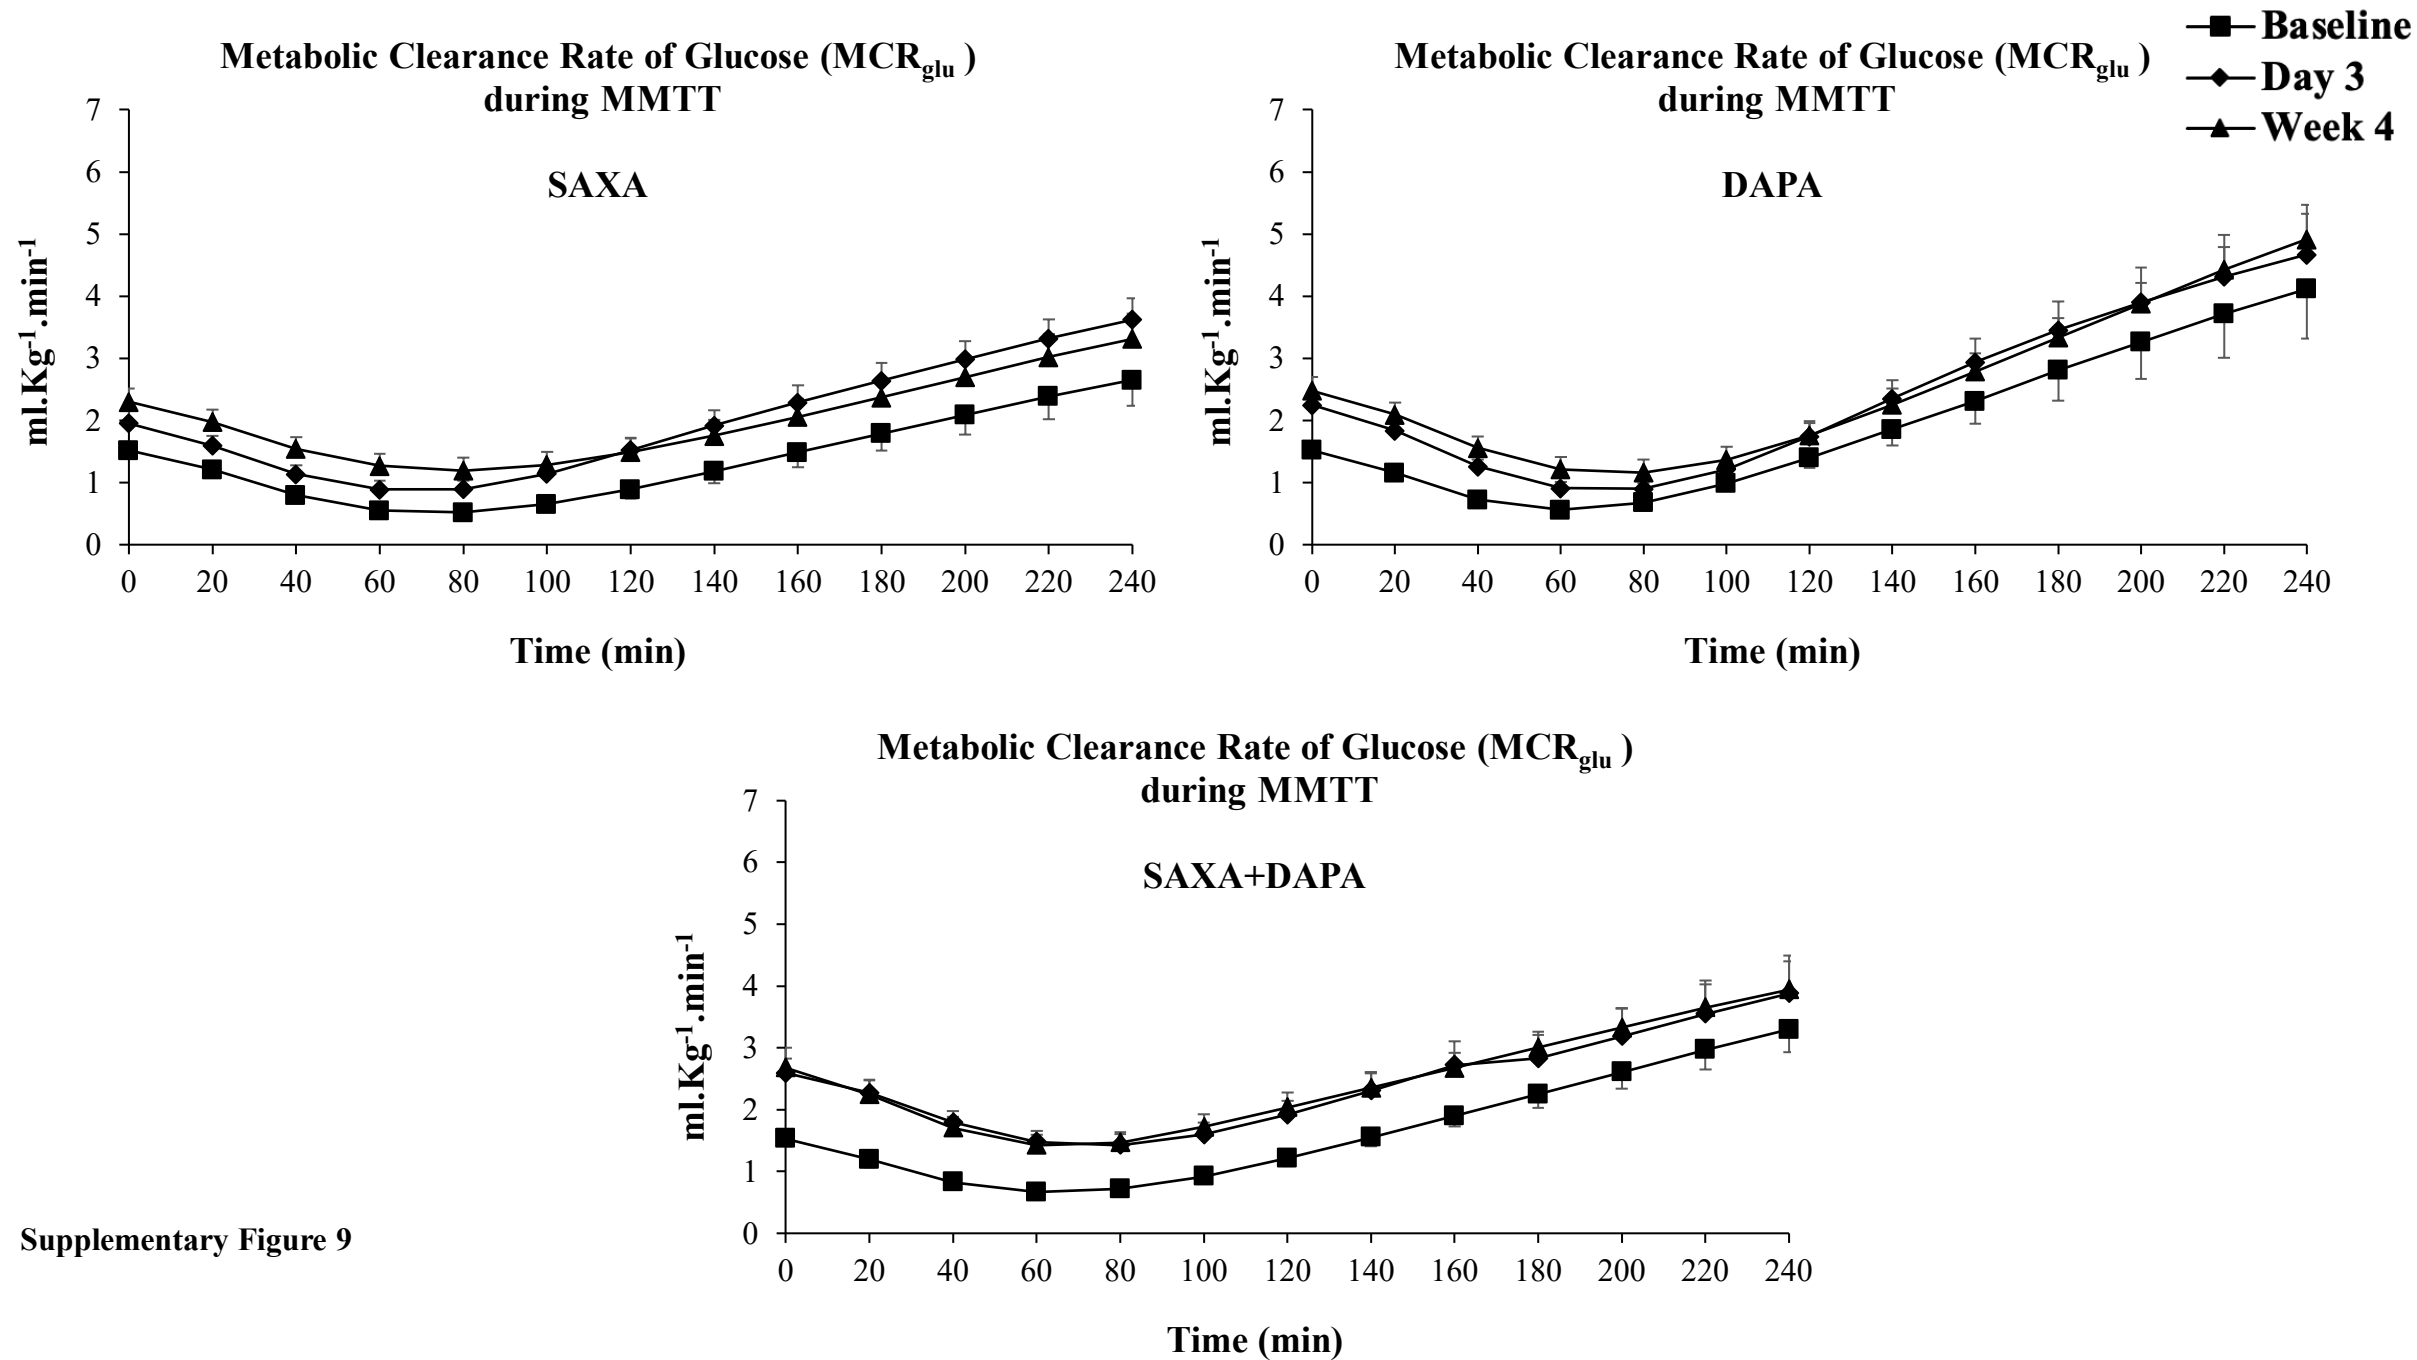

Supplementary Figure 9

Supplement: Supplementary file 4 [file 1]

A

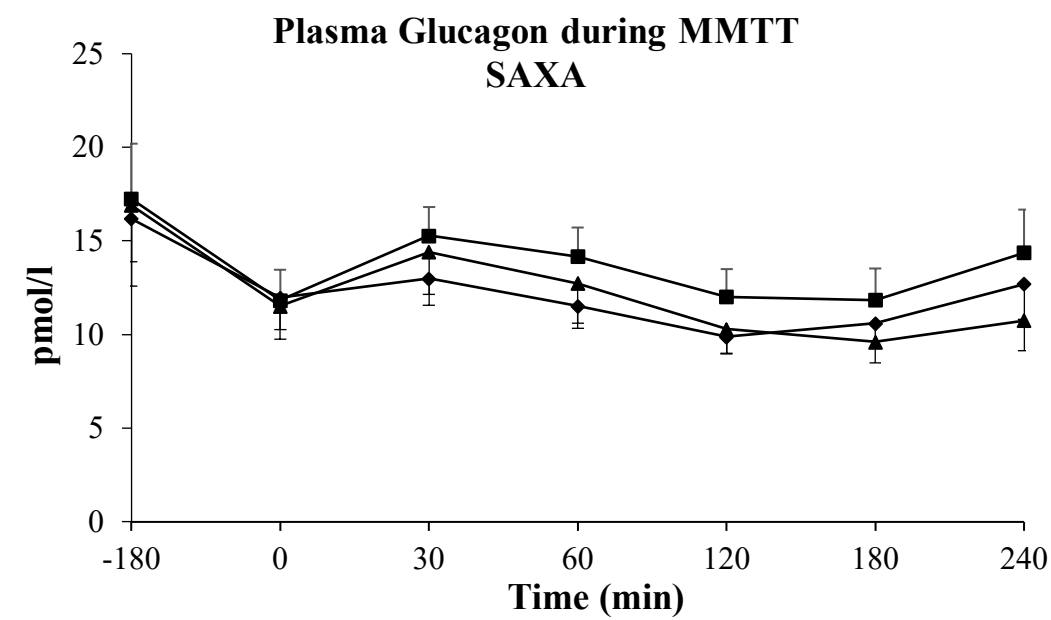

B

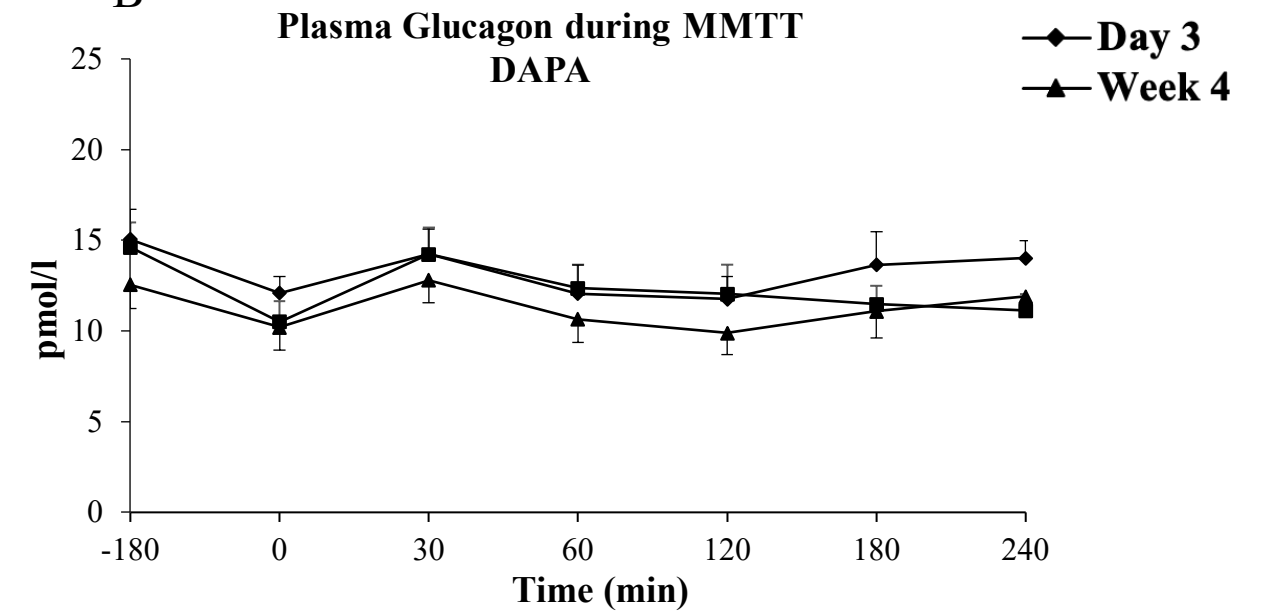

C

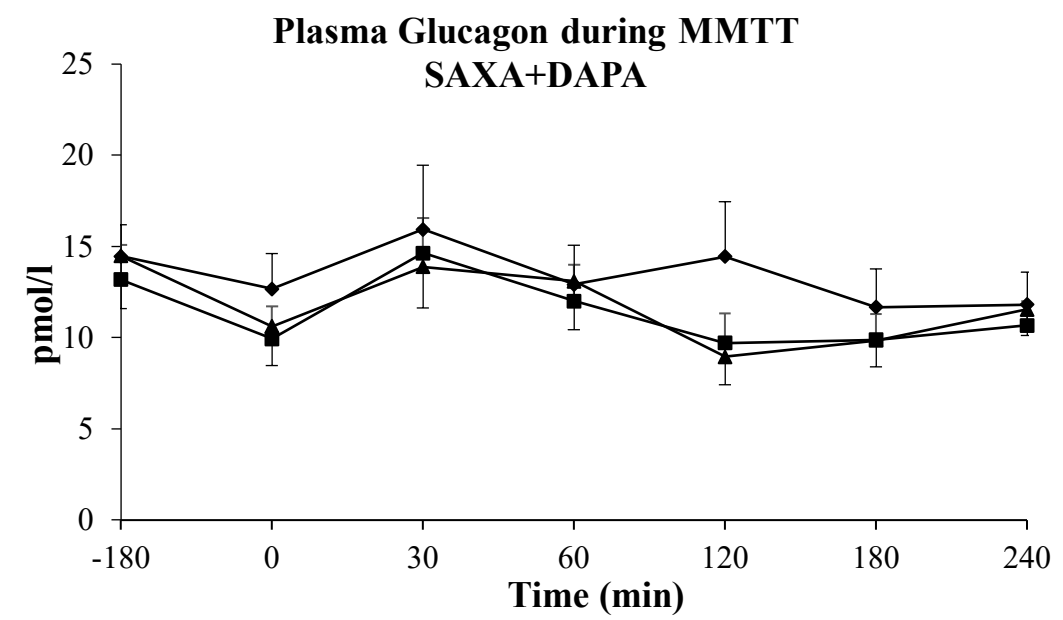

Supplementary Figure 3

Supplement: Supplementary file 7 [file 1]

A

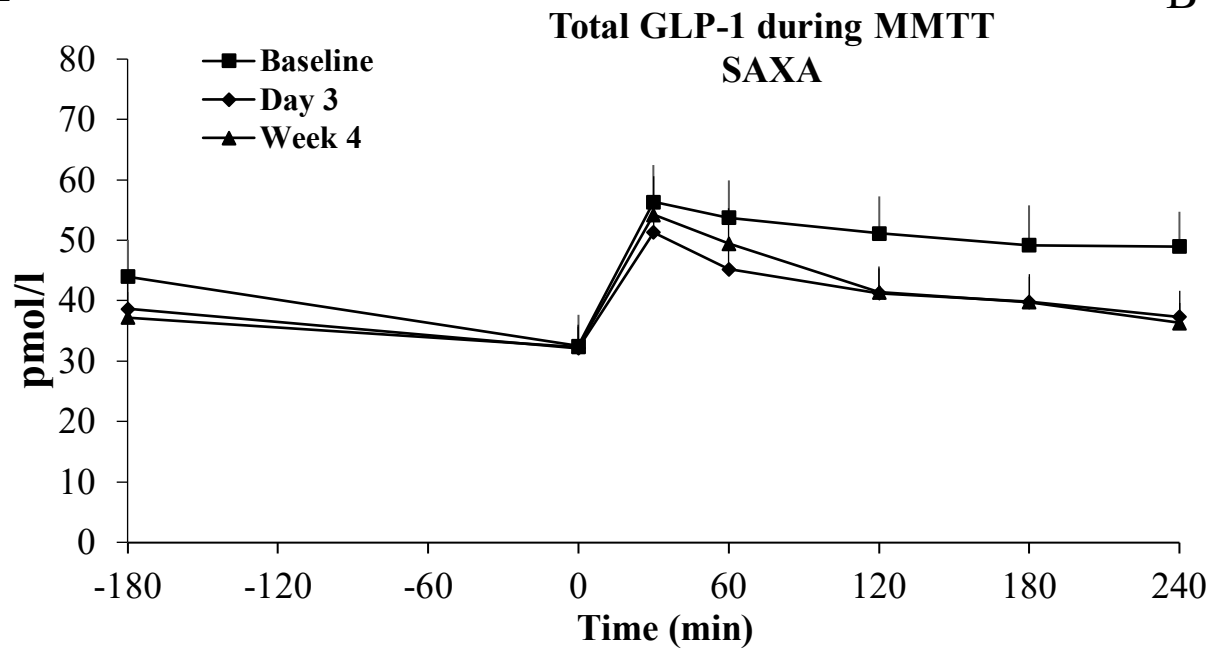

B

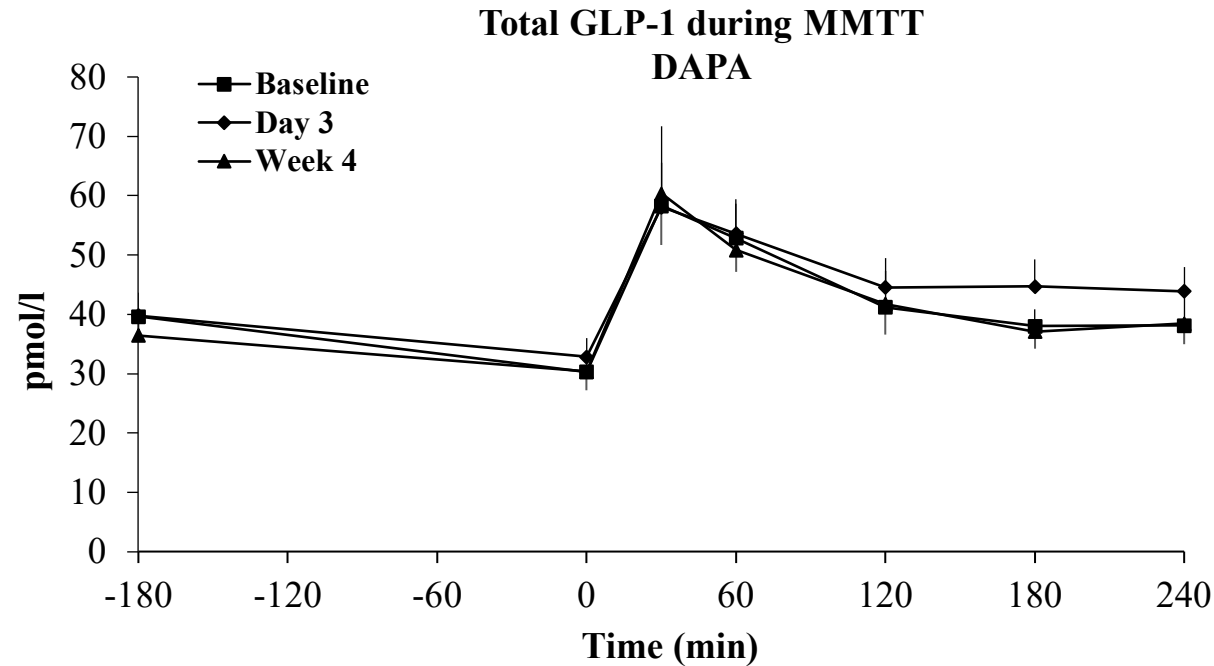

C

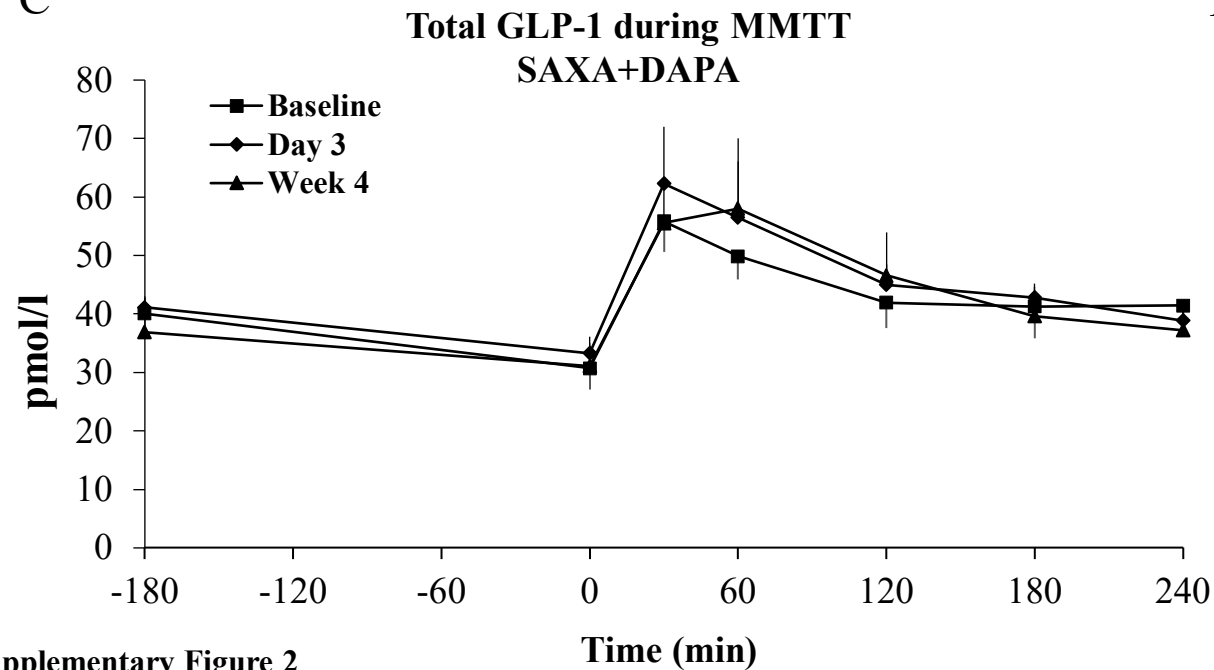

D

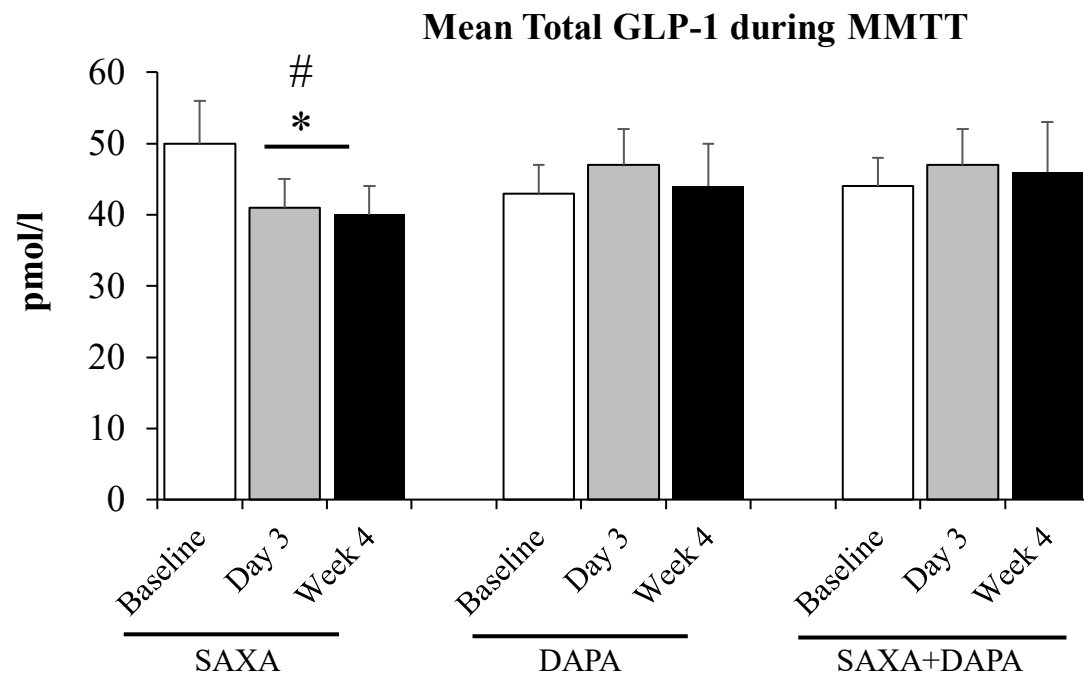

Supplementary Figure 2

Supplement: Supplementary file 8 [file 1]

A

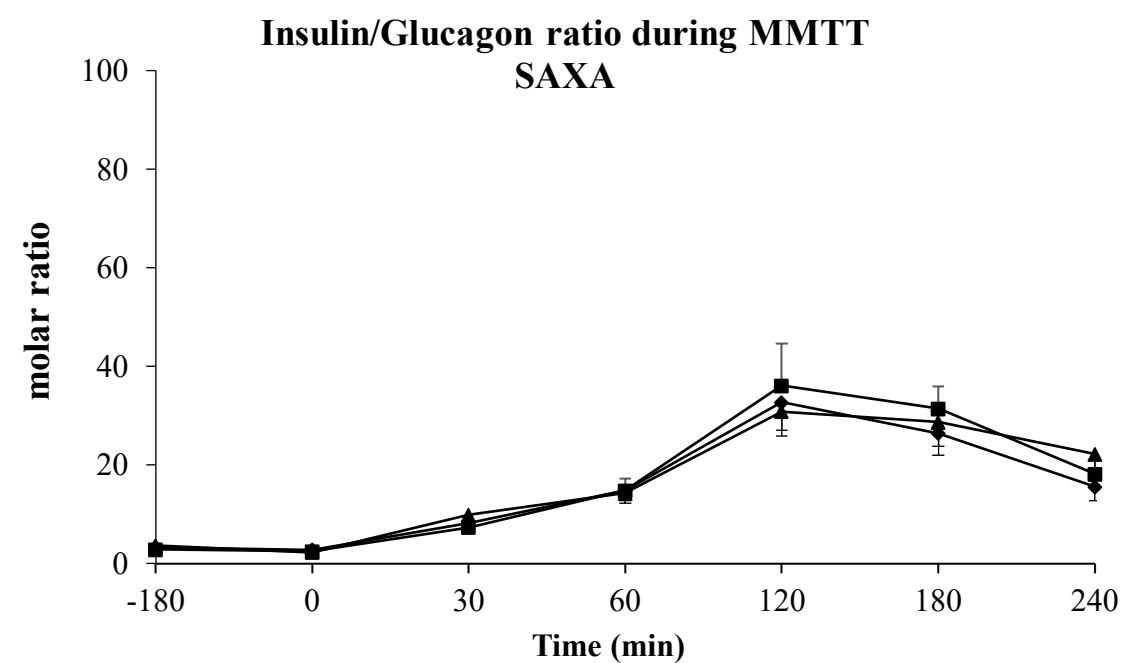

B

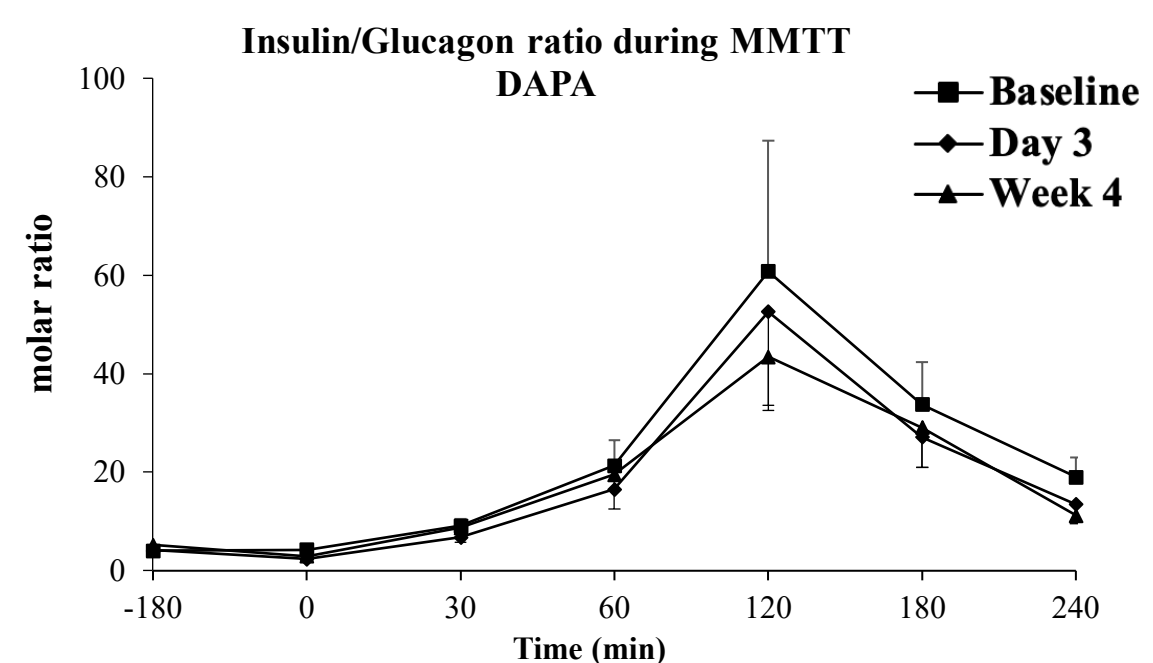

C

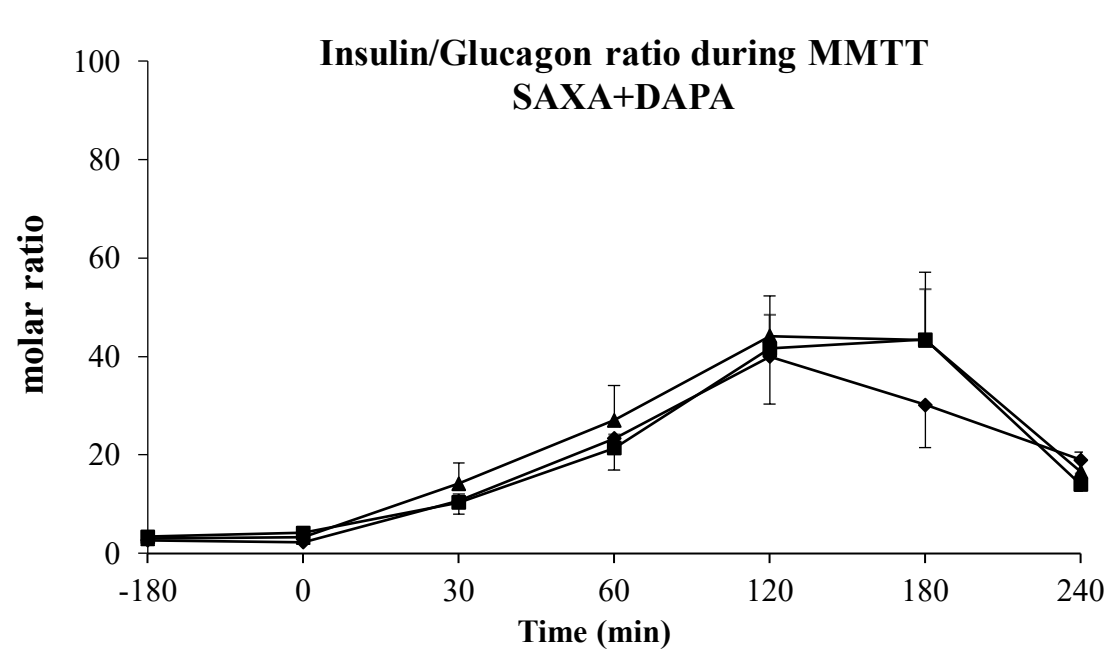

Supplementary Figure 4

Supplement: Supplementary file 9 [file 1]

A

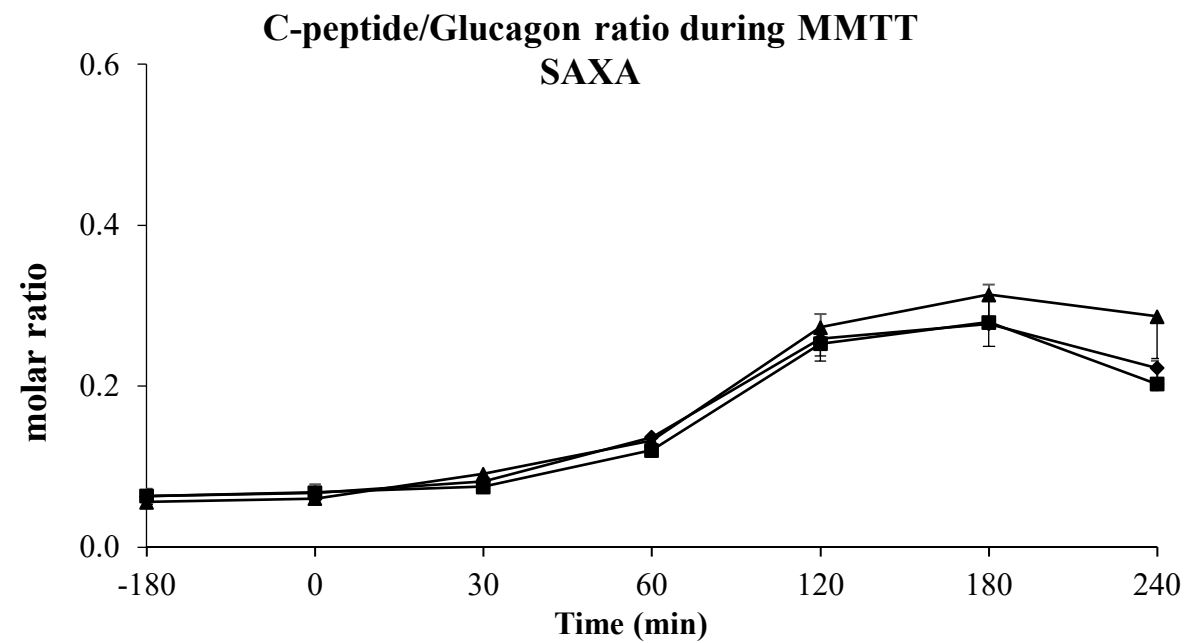

B

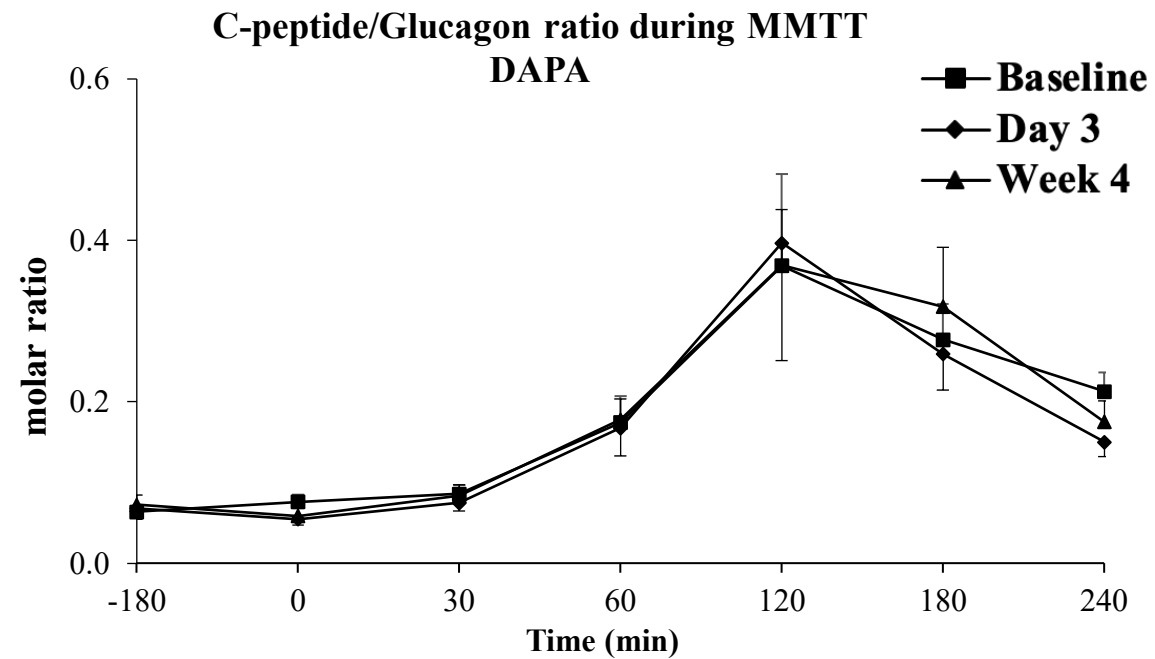

C

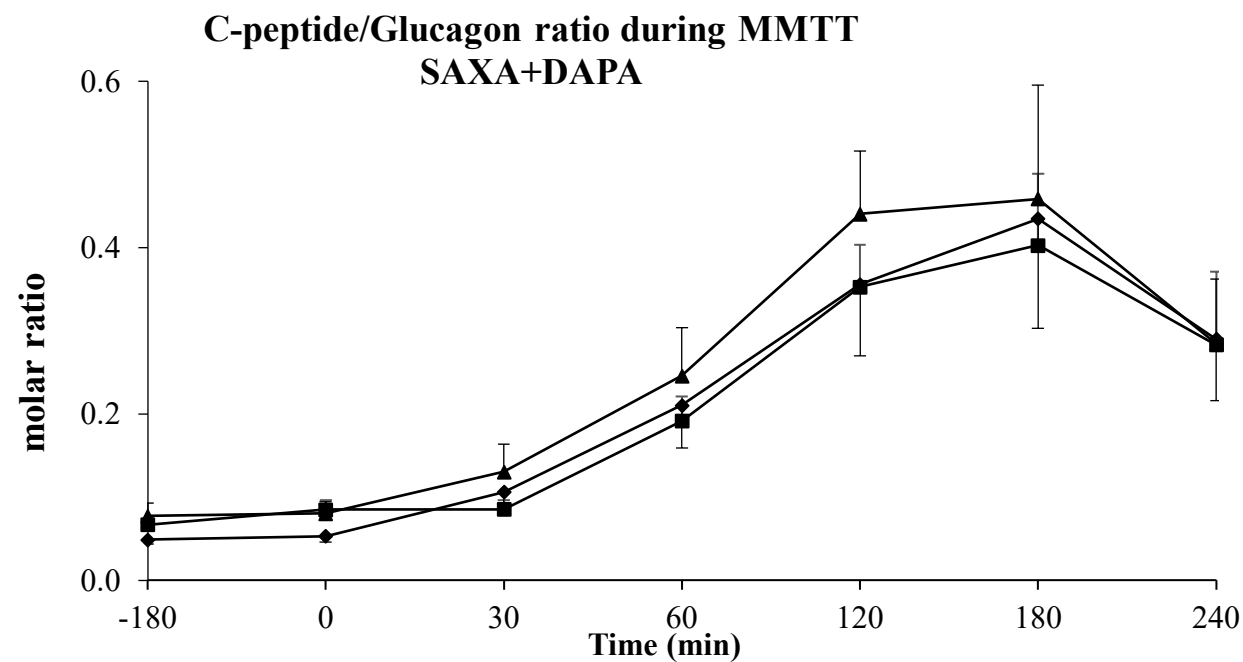

Supplementary Figure 5

Supplement: Supplementary file 10 [file 1]

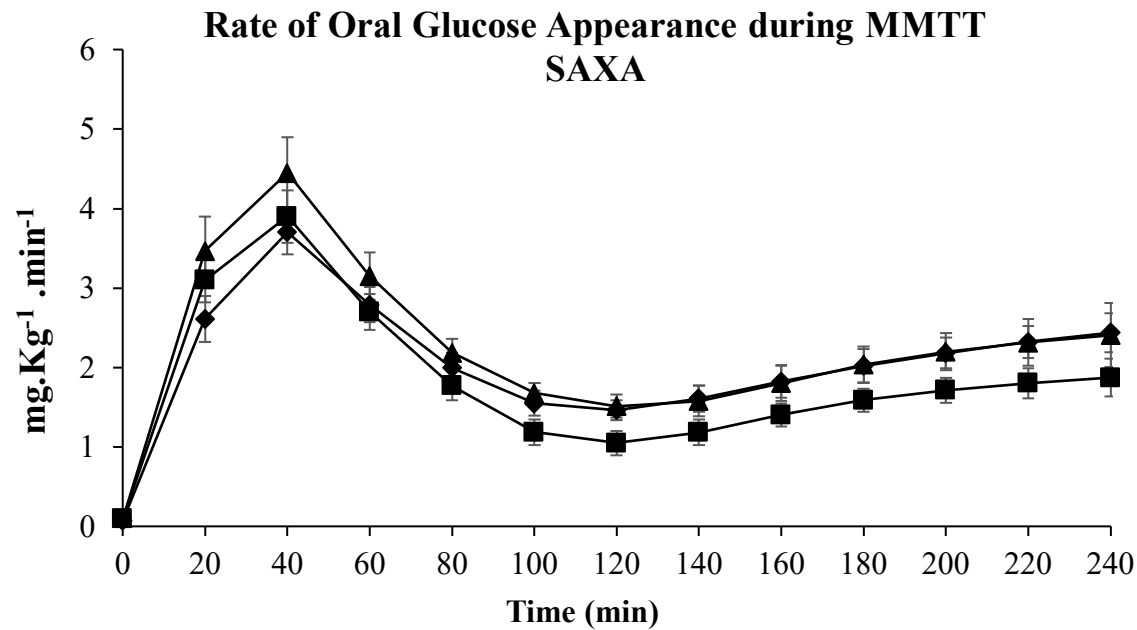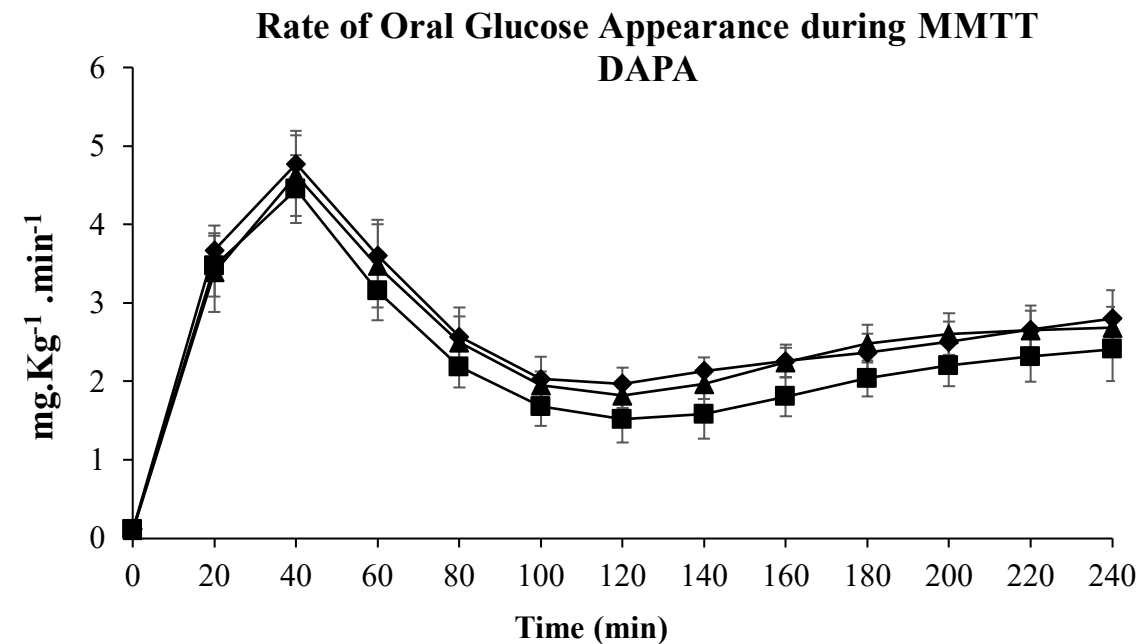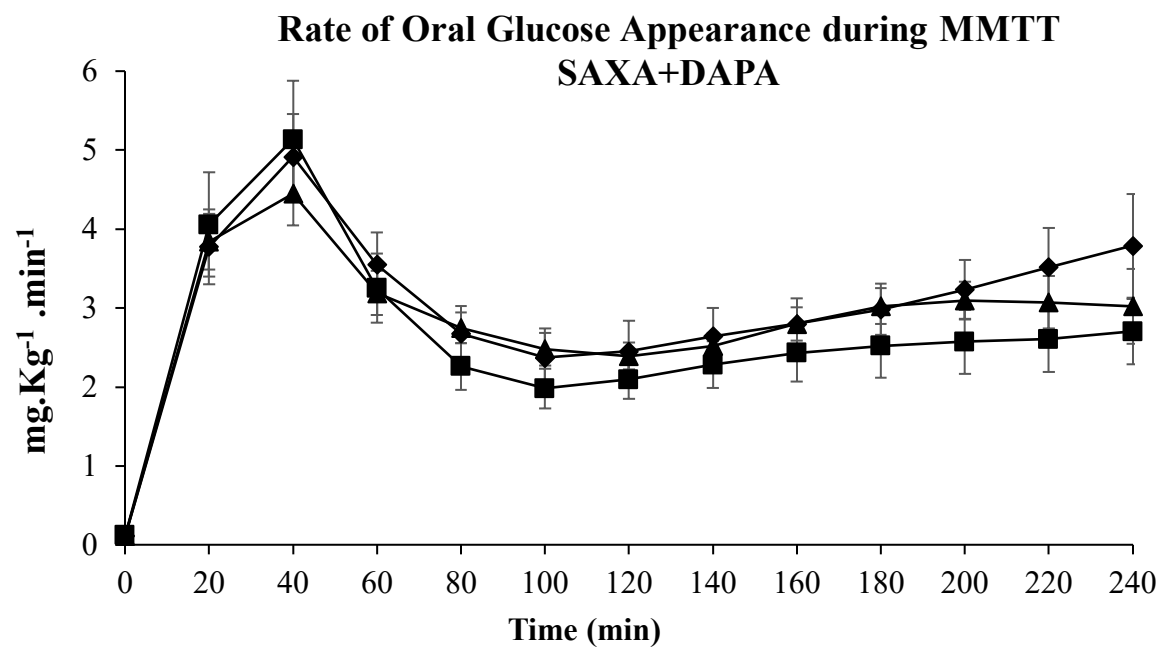

Supplementary Figure 10

Supplement: Supplementary file 11 [file 1]

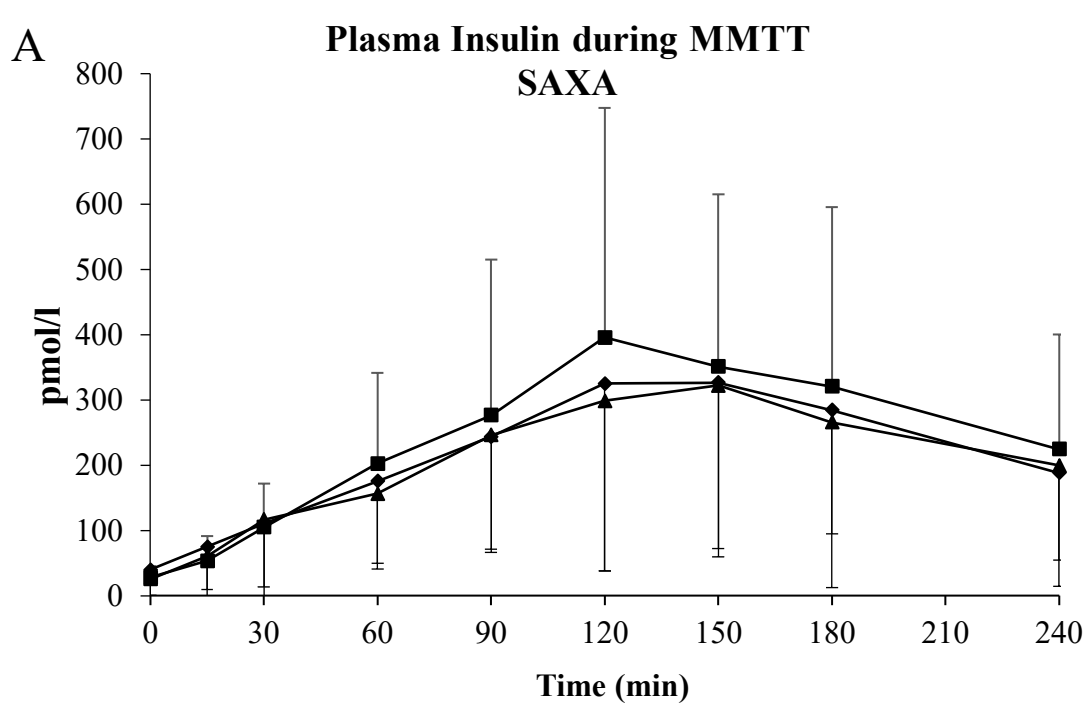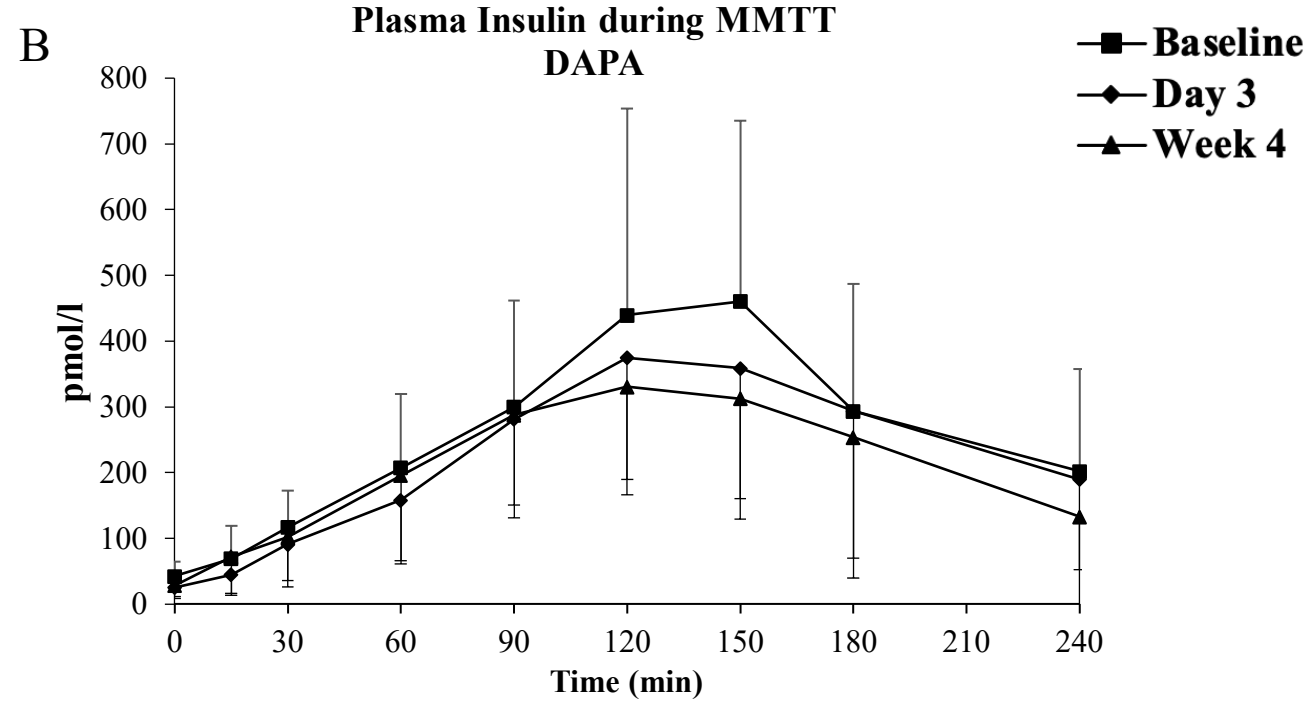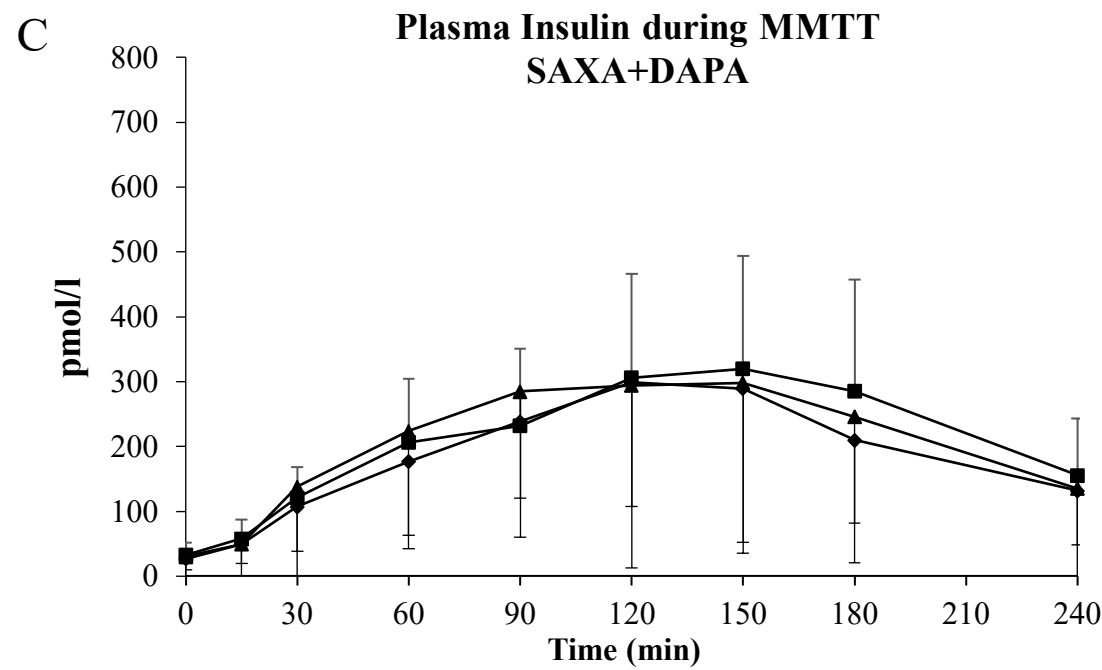

Supplementary Figure 6

Supplement: Supplementary file 12 [file 1]
